# Supplementary material for: Exploring the power of Bayesian birth‐death skyline models to detect mass extinction events from phylogenies with only extant taxa
Source: PubMed Central journal article supplement — Evolution. 2019 May 9;73(6):1133–50. doi: 10.1111/evo.13753 (PMC6767073; doi:10.1111/evo.13753), 2019-05-09
Supplement: EVO-73-1133-s001.pdf [file EVO-73-1133-s001.pdf]

$\rho = 0.1$

Number of Extant (N)

Background Extinction and Time of MEE ( $\mu, t$ )

$\mu=0, t=2$

100

200

500

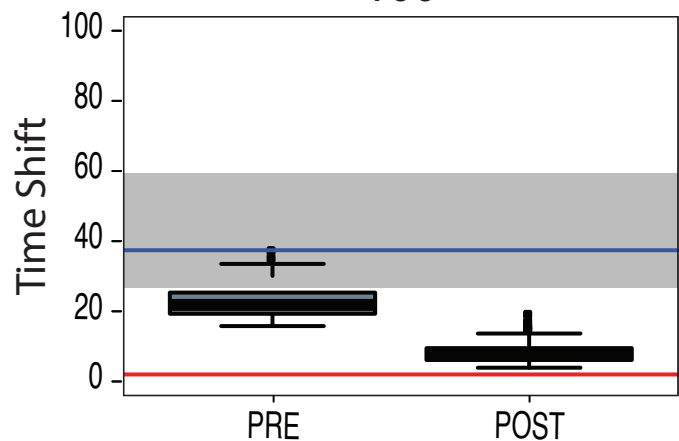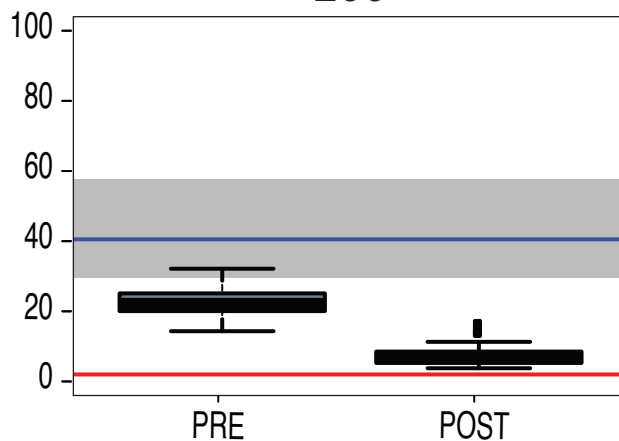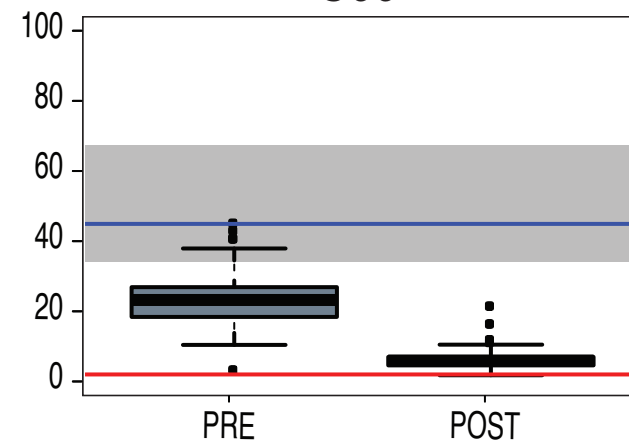

$\mu=0.1, t=4$

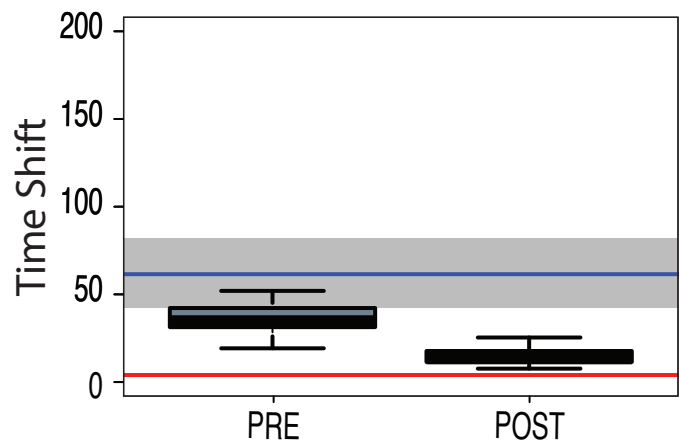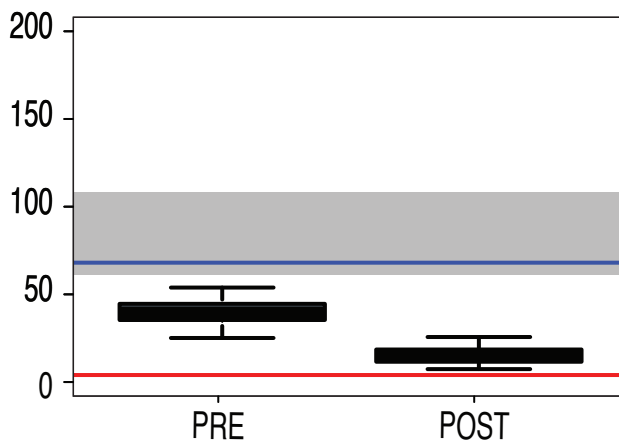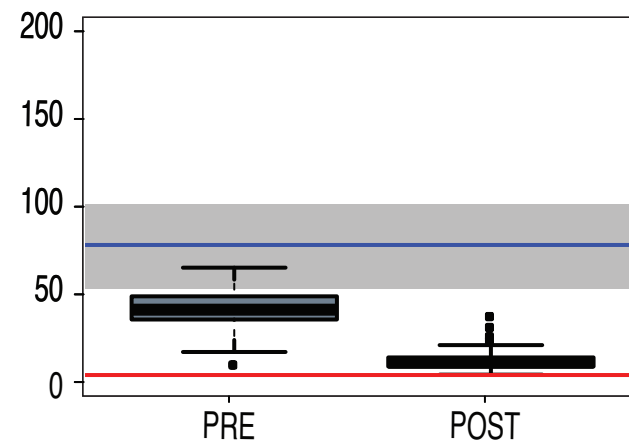

$\mu=0.18, t=20$

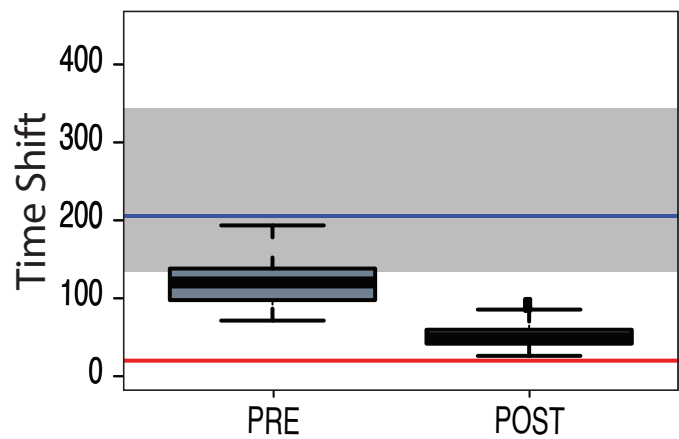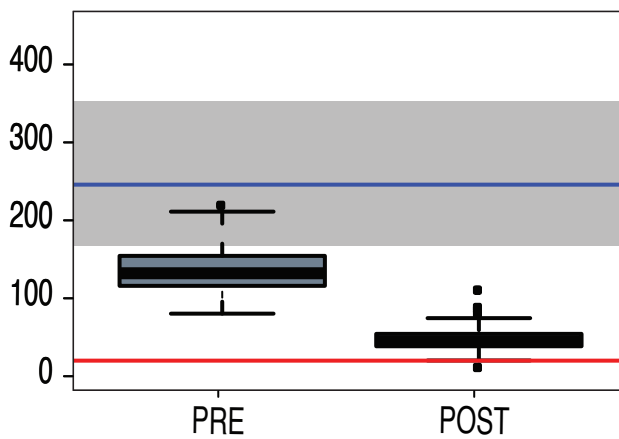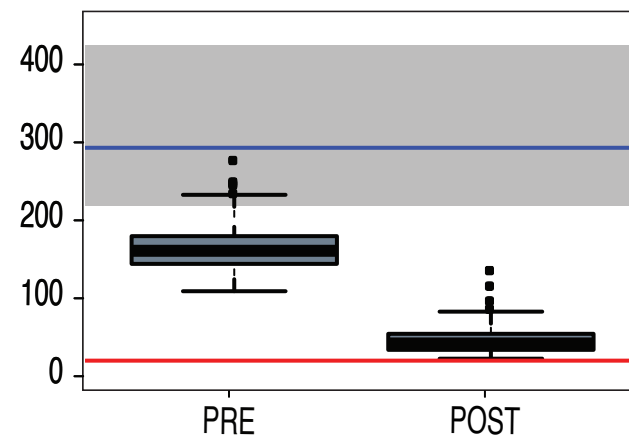

Time Interval

Time Interval

Time Interval
