# Supplementary figures and images for: Exploring the power of Bayesian birth‐death skyline models to detect mass extinction events from phylogenies with only extant taxa
Source: PubMed Central journal article supplement — Evolution. 2019 May 9;73(6):1133–50. doi: 10.1111/evo.13753 (PMC6767073; doi:10.1111/evo.13753), 2019-05-09

n = 500

### Survival Probability ( $\rho$ )

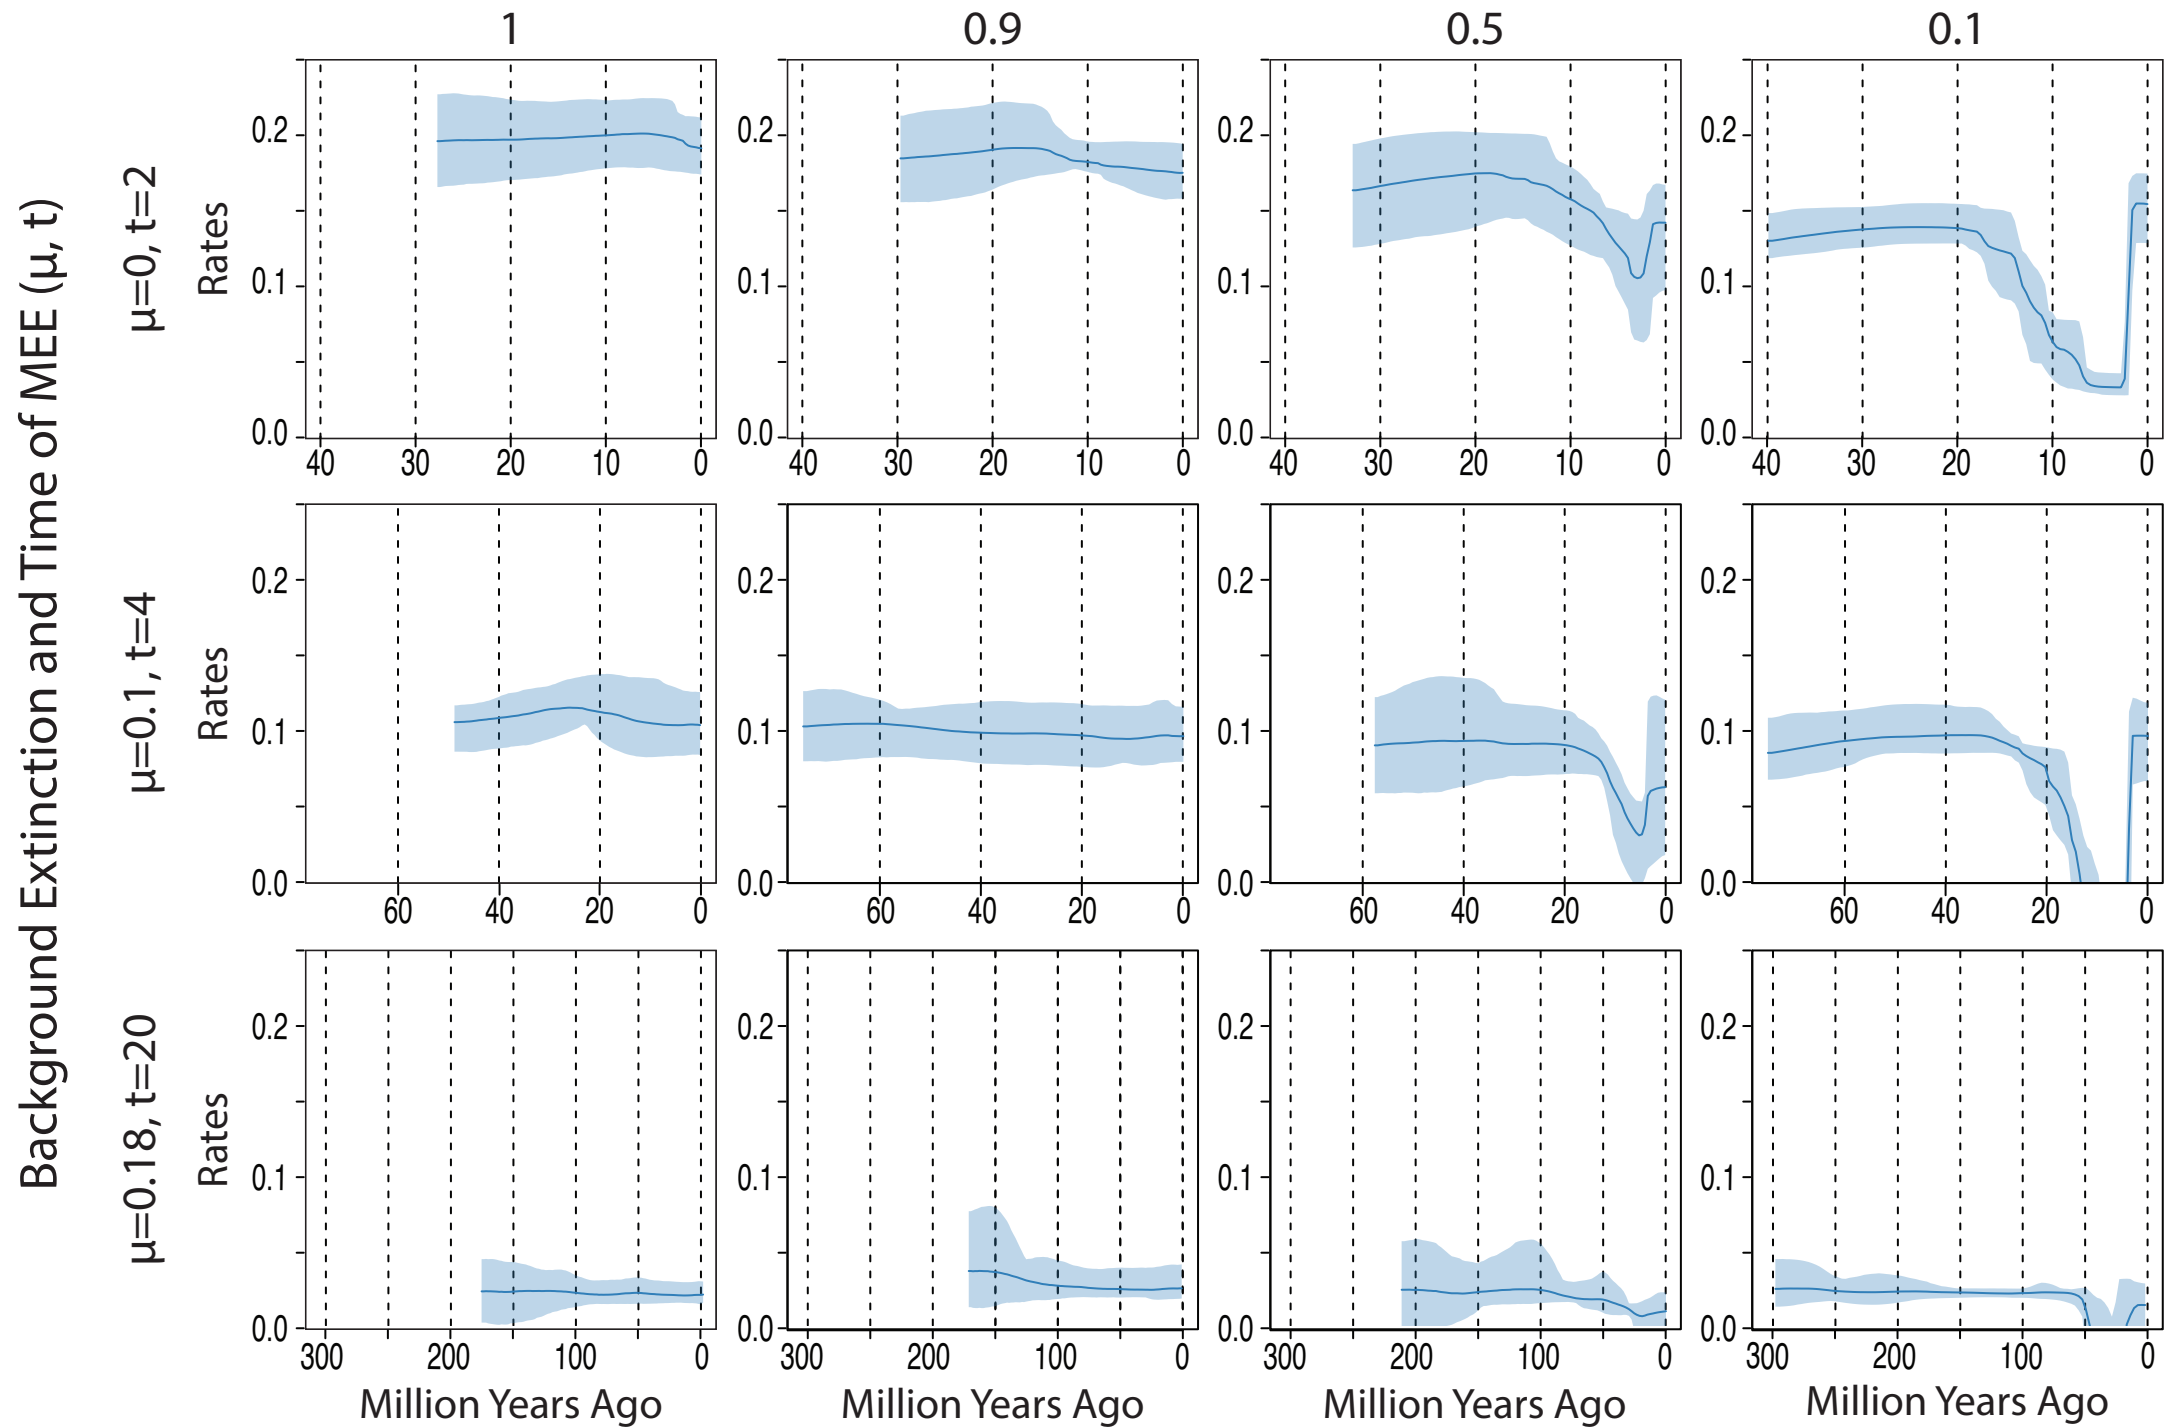

Supplement: EVO-73-1133-s003.pdf [file EVO-73-1133-s003.pdf]

n = 500

### Survival Probability ( $\rho$ )

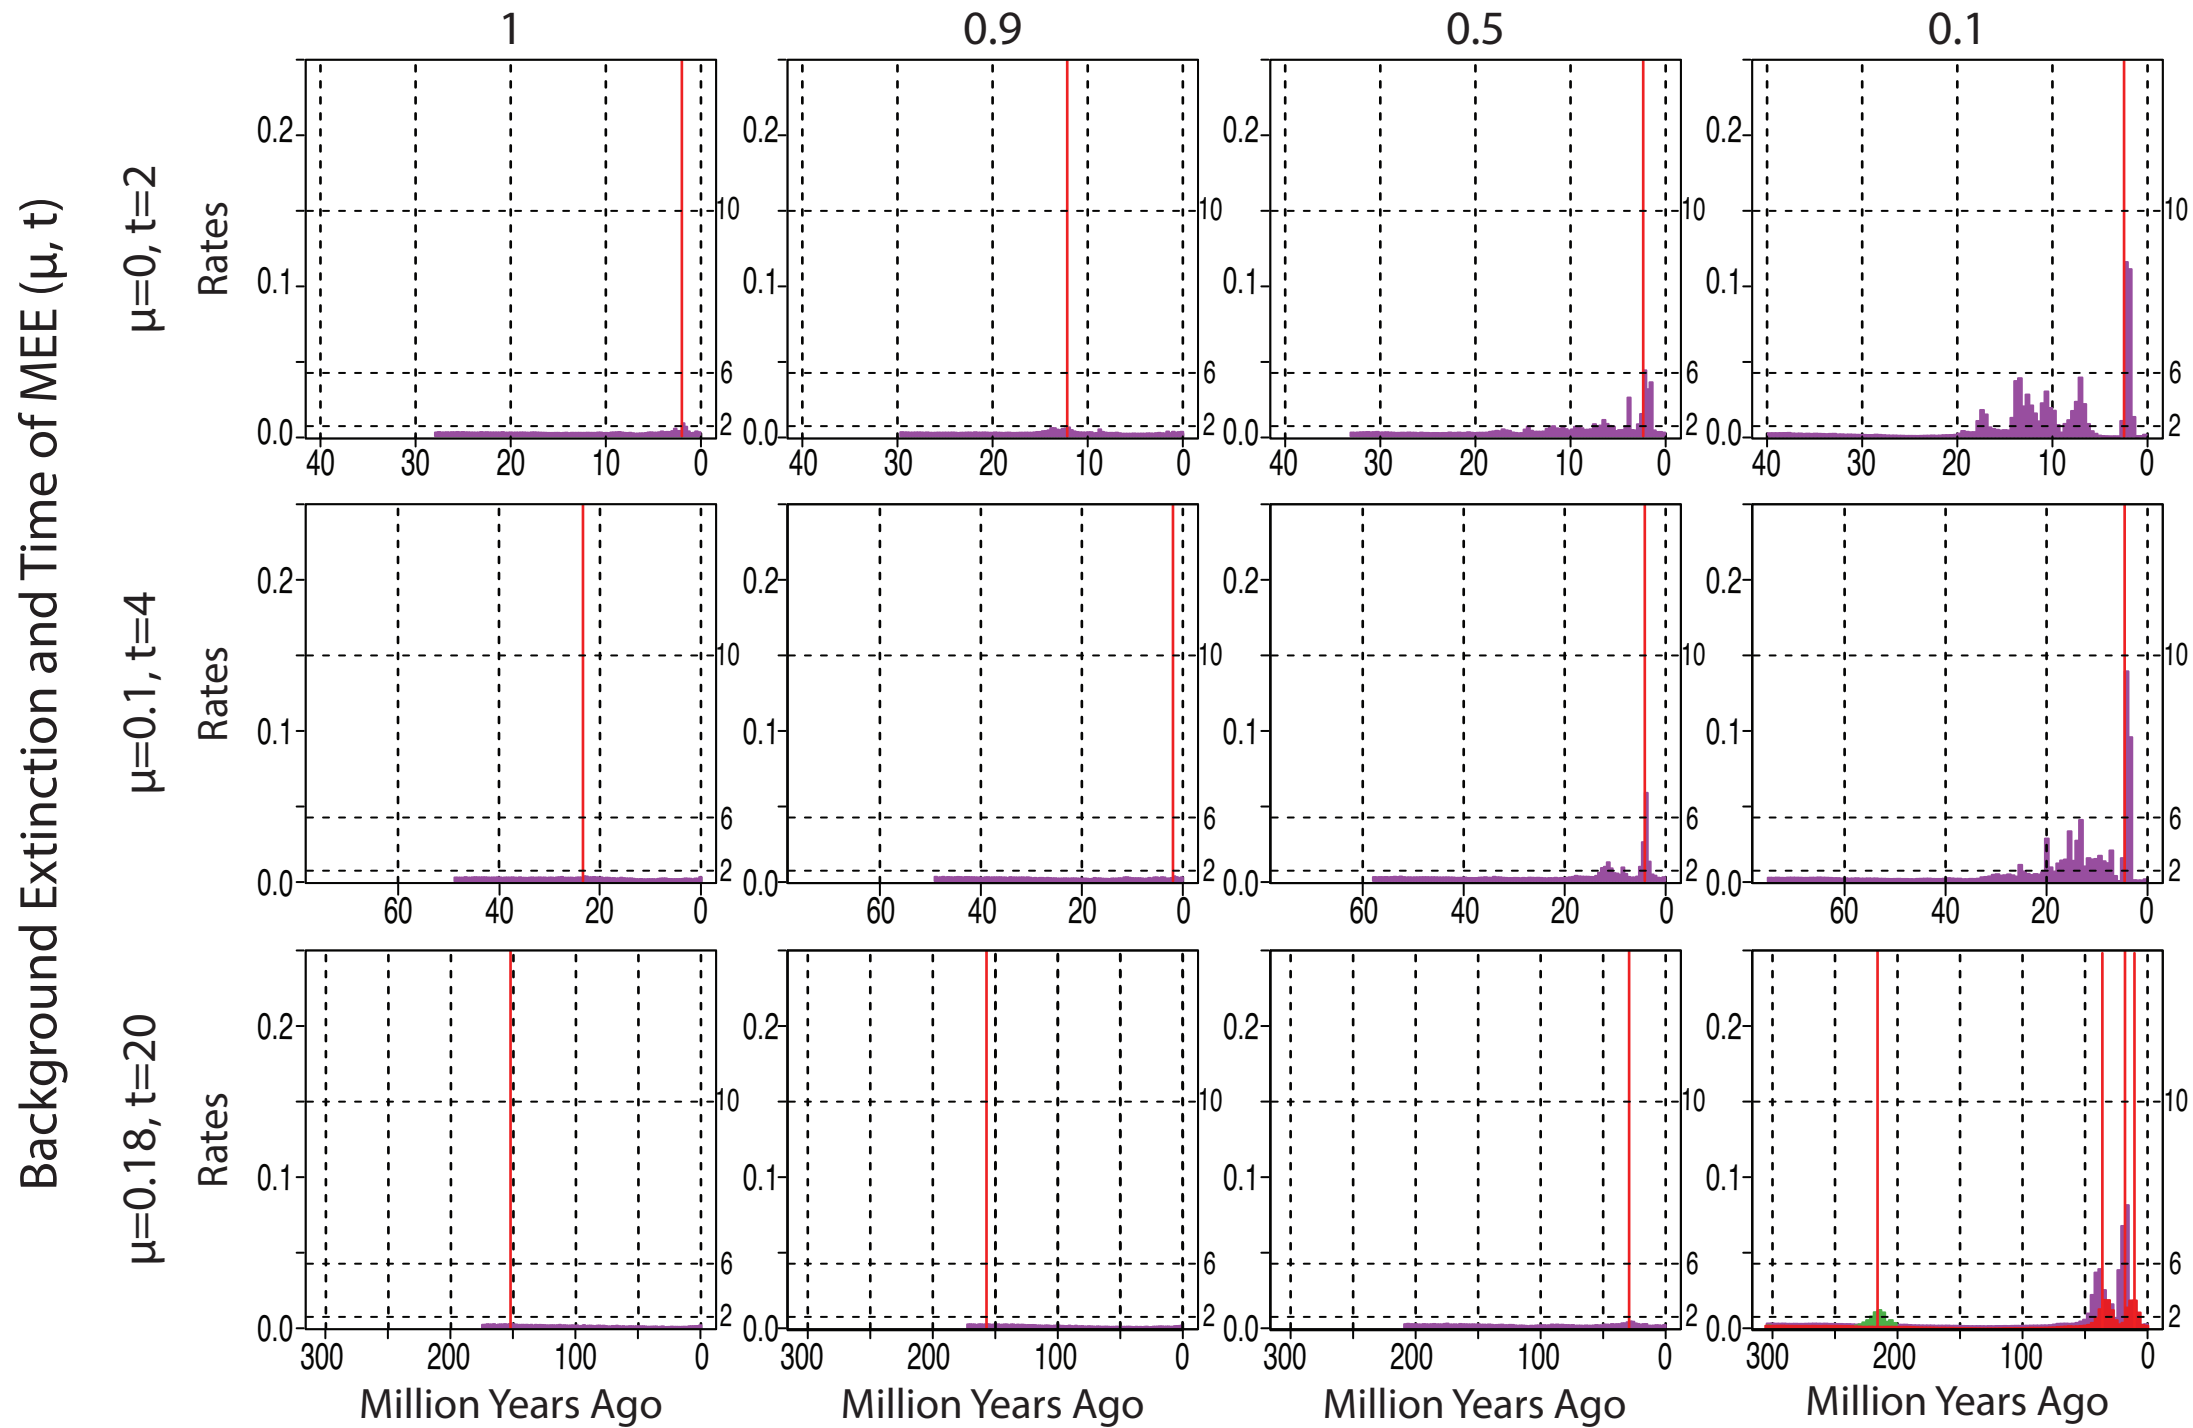

Supplement: EVO-73-1133-s005.pdf [file EVO-73-1133-s005.pdf]

$\rho = 0.1$

Number of Extant (N)

Background Extinction and Time of MEE ( $\mu, t$ )

$\mu=0, t=2$

$\mu=0.1, t=4$

$\mu=0.18, t=20$

100

200

500

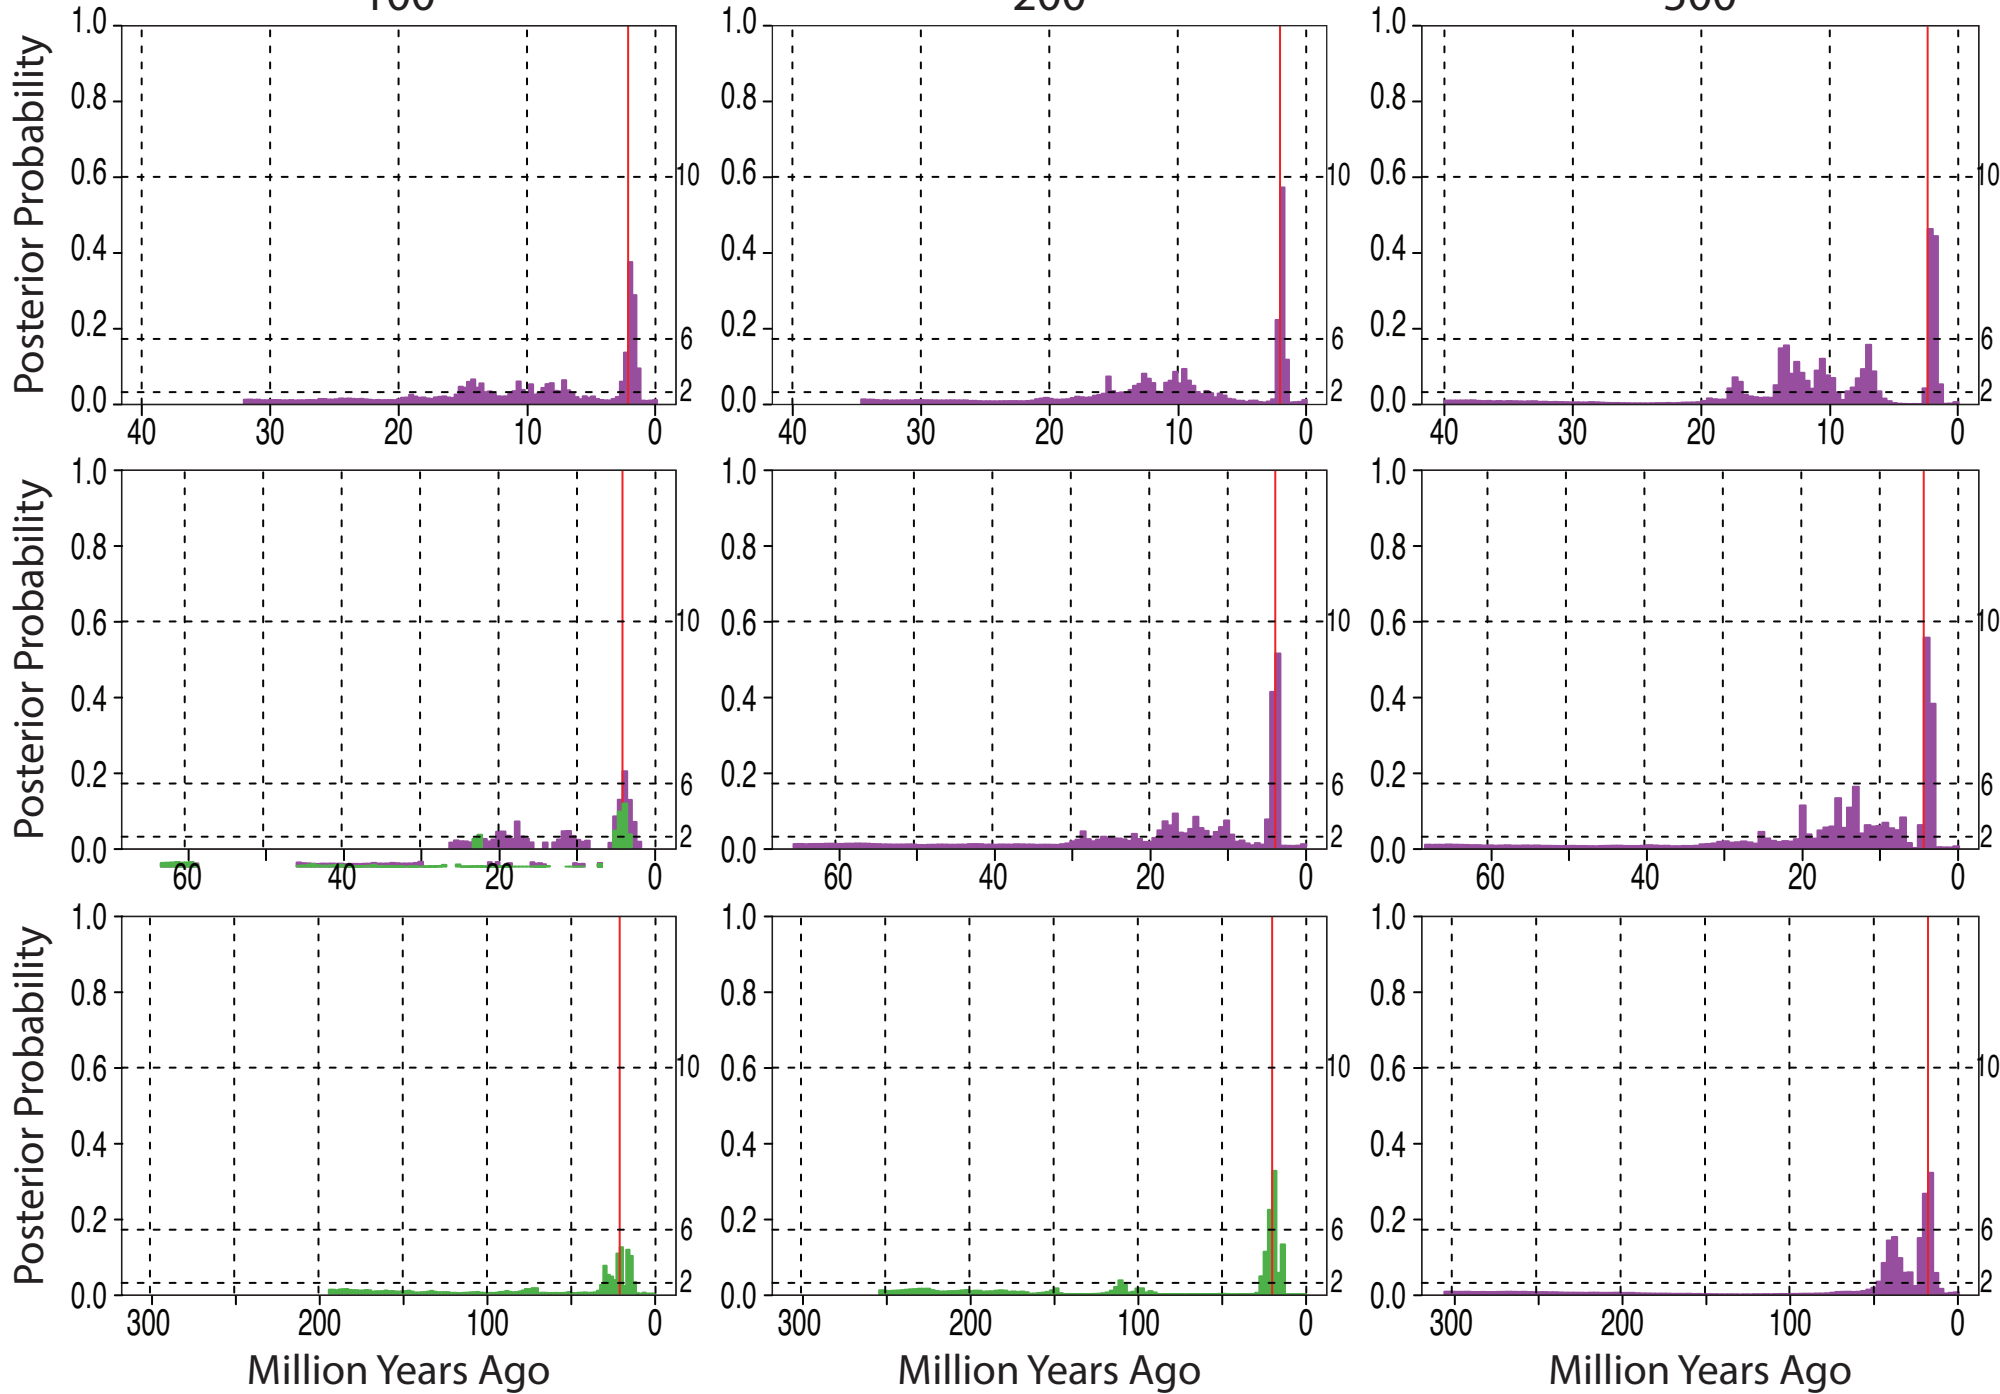

Supplement: EVO-73-1133-s006.pdf [file EVO-73-1133-s006.pdf]

n = 500

# Survival Probability ( $\rho$ )

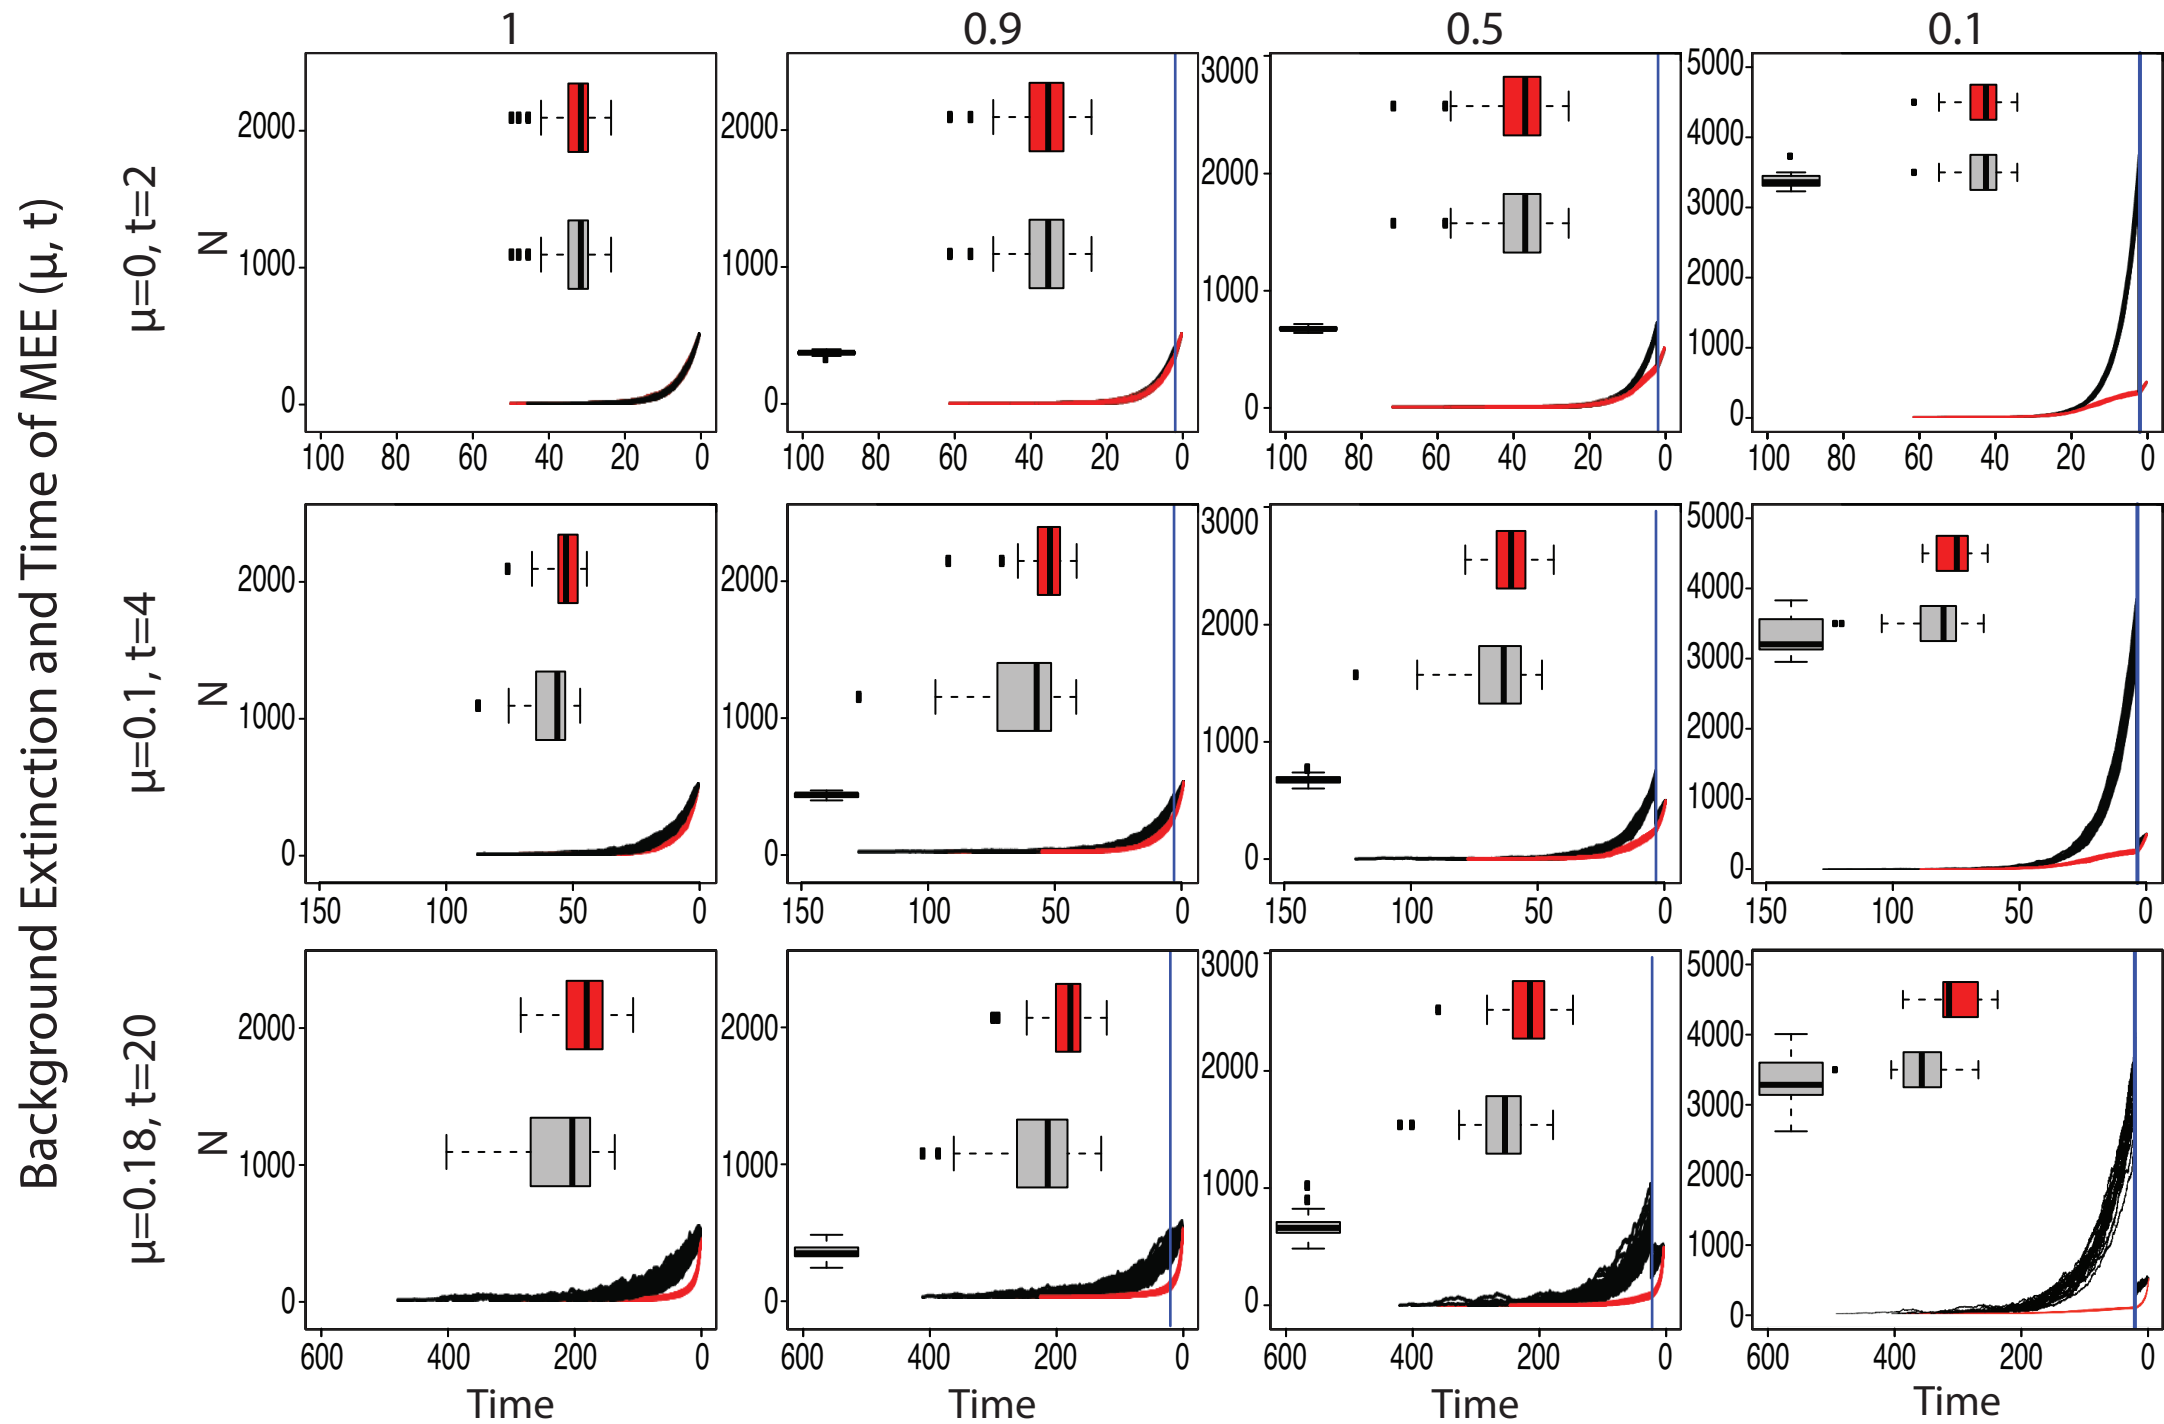

Supplement: EVO-73-1133-s012.pdf [file EVO-73-1133-s012.pdf]

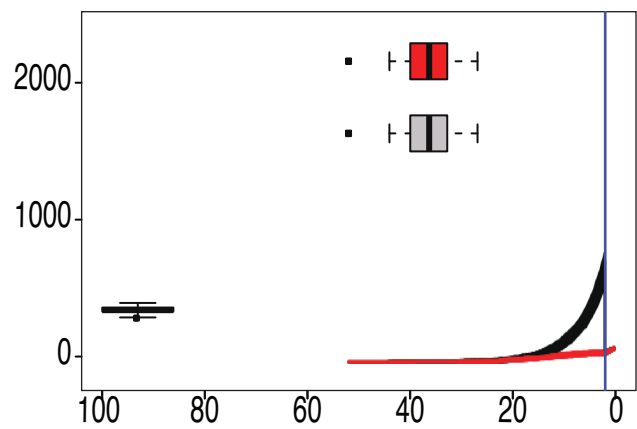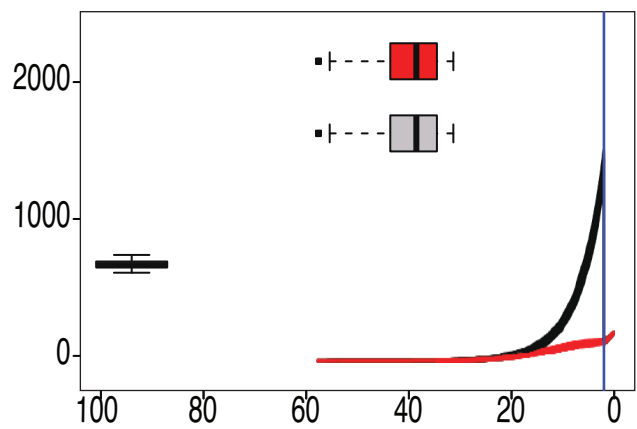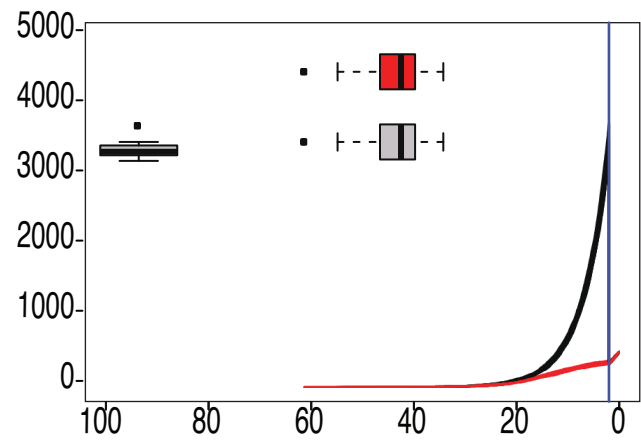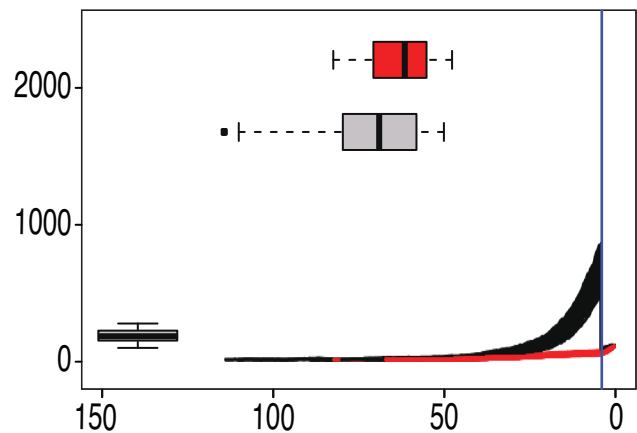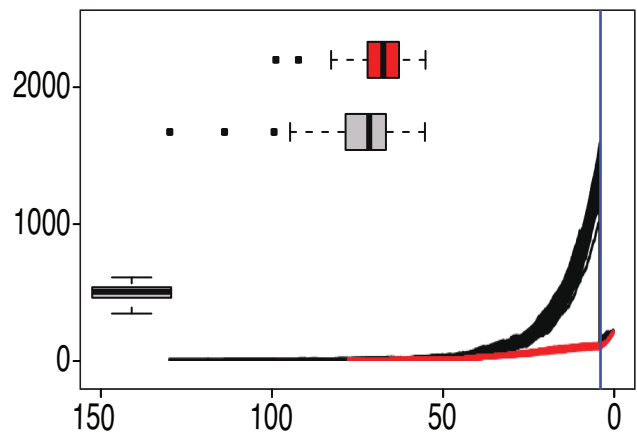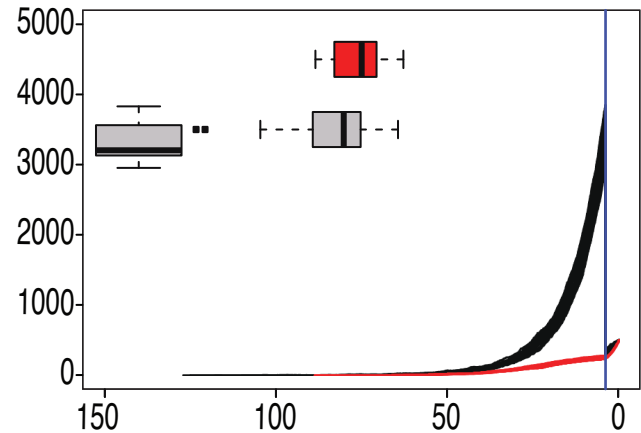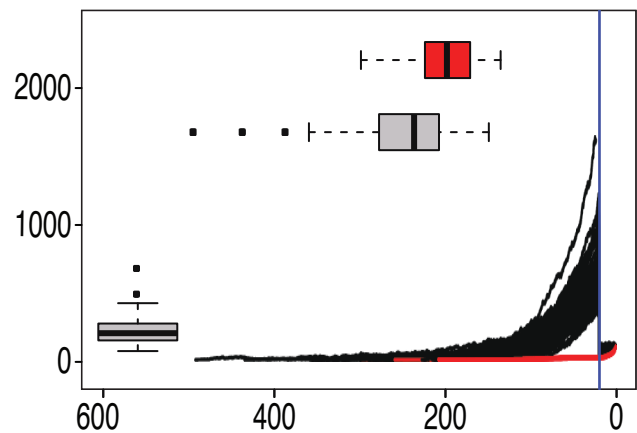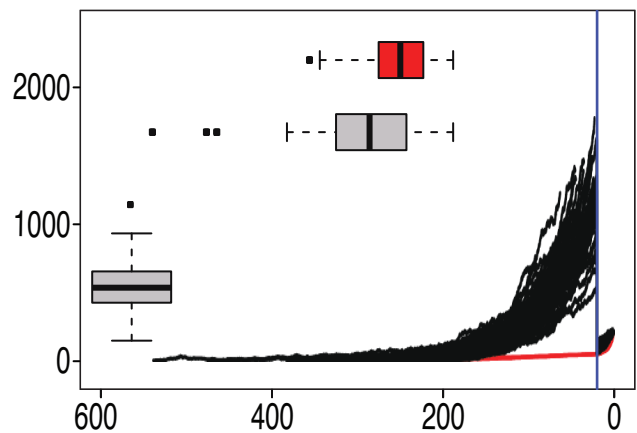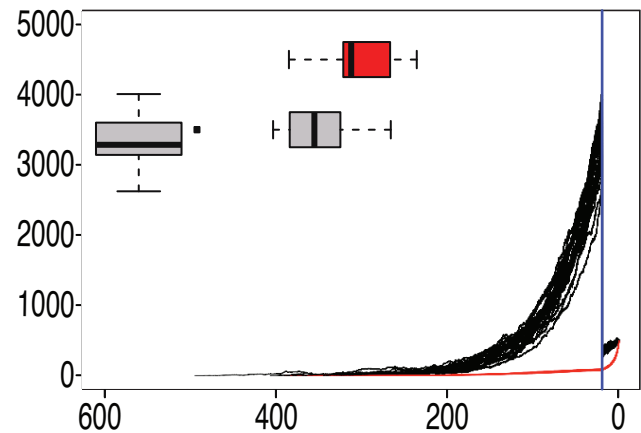

Time

Time

Time

Supplement: EVO-73-1133-s013.pdf [file EVO-73-1133-s013.pdf]

n = 500

Background Extinction and Time of MEE ( $\mu, t$ )

Survival Probability ( $\rho$ )

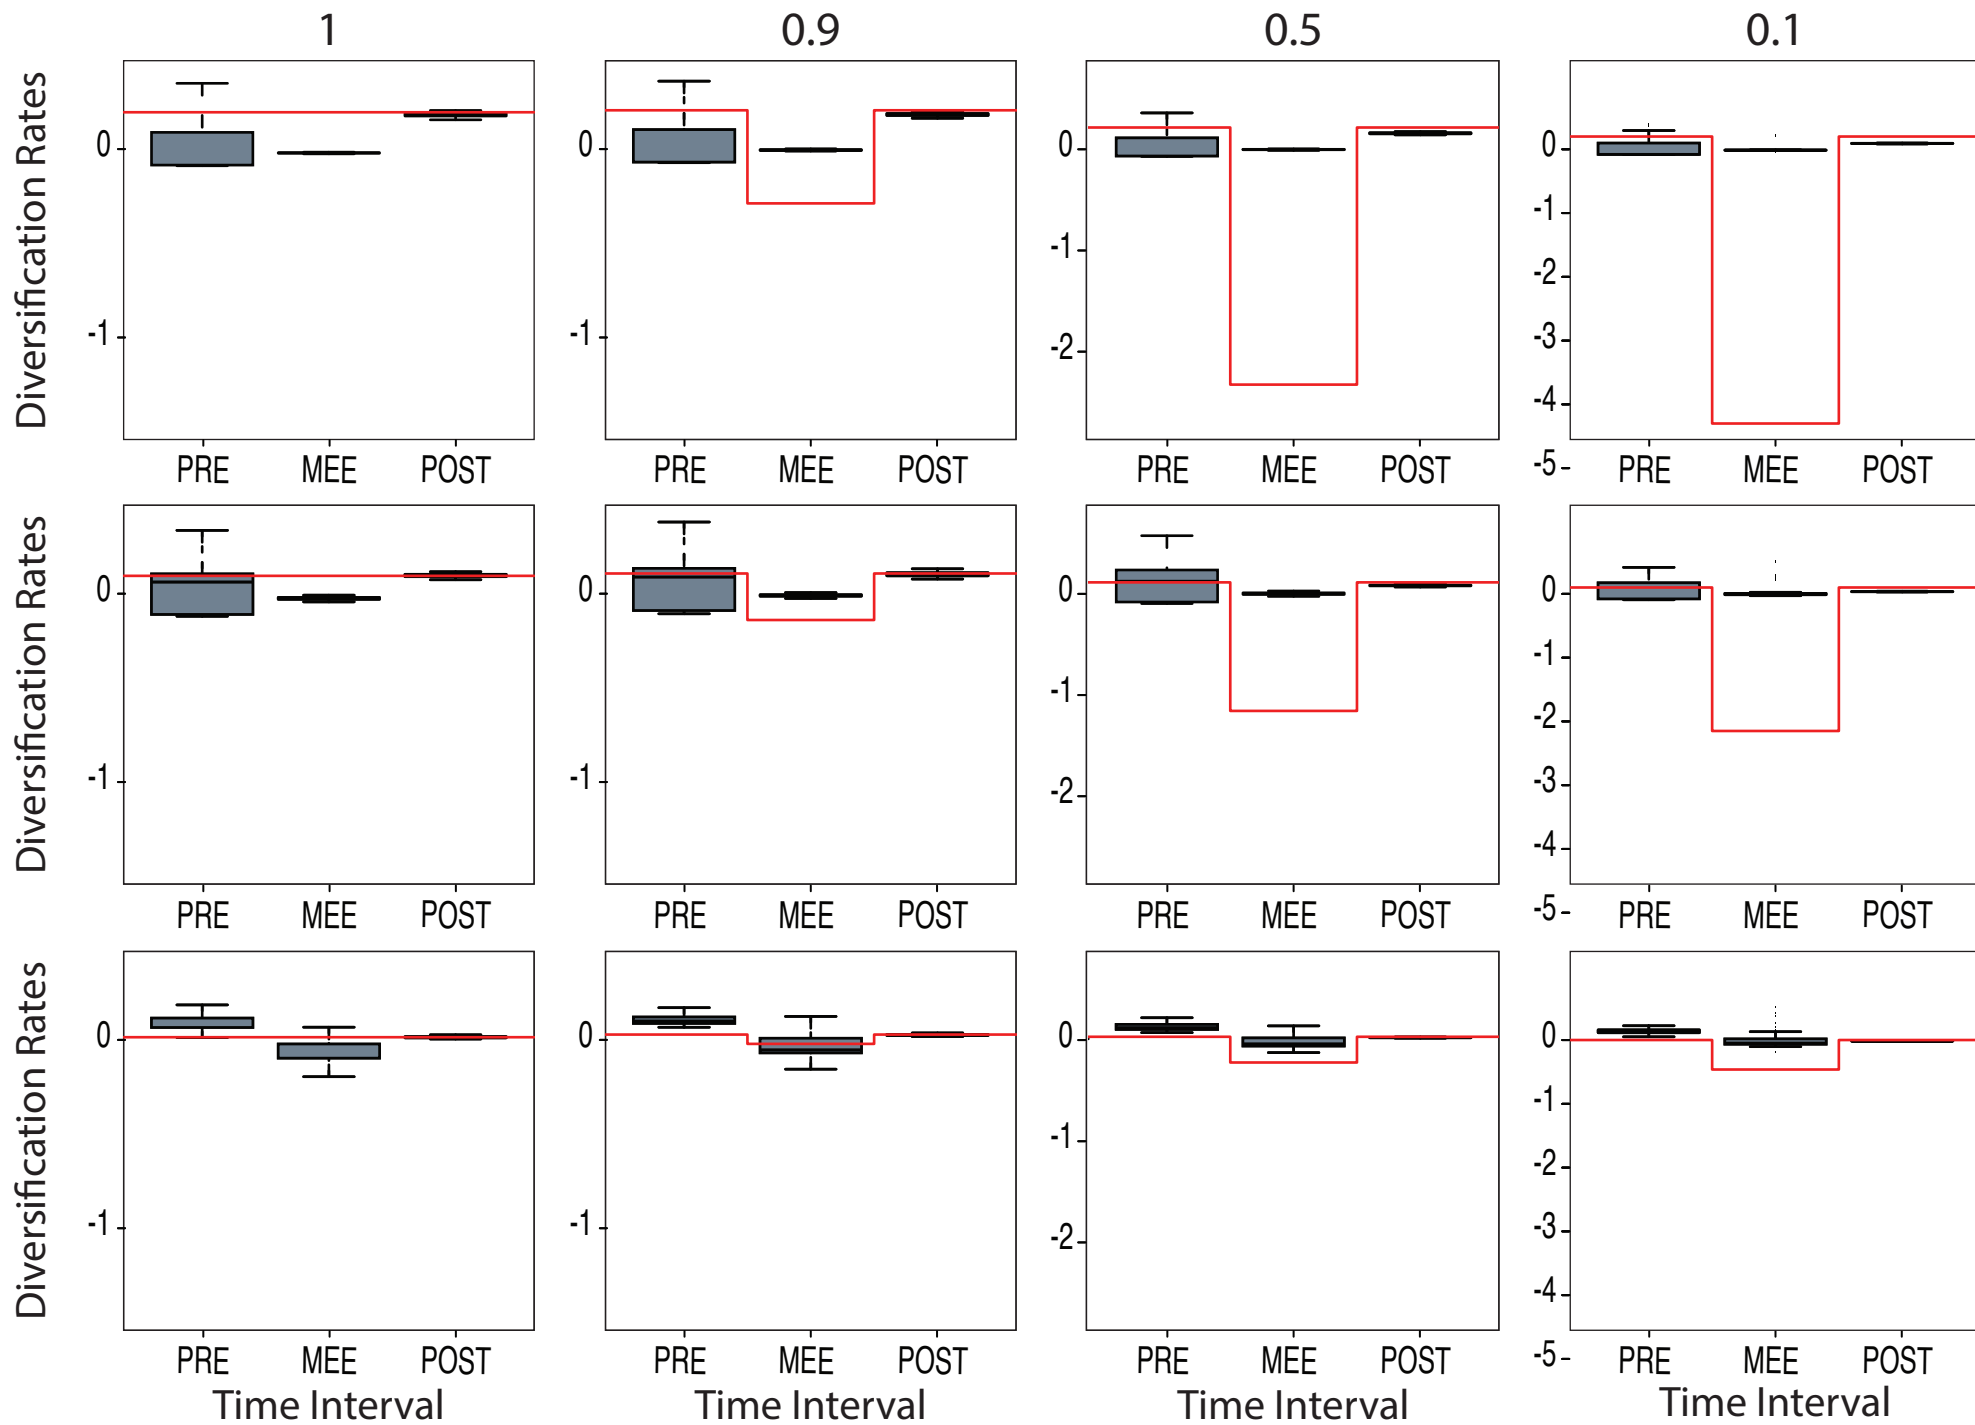

Supplement: EVO-73-1133-s015.pdf [file EVO-73-1133-s015.pdf]

n = 500

# Survival Probability ( $\rho$ )

Background Extinction and Time of MEE ( $\mu, t$ )

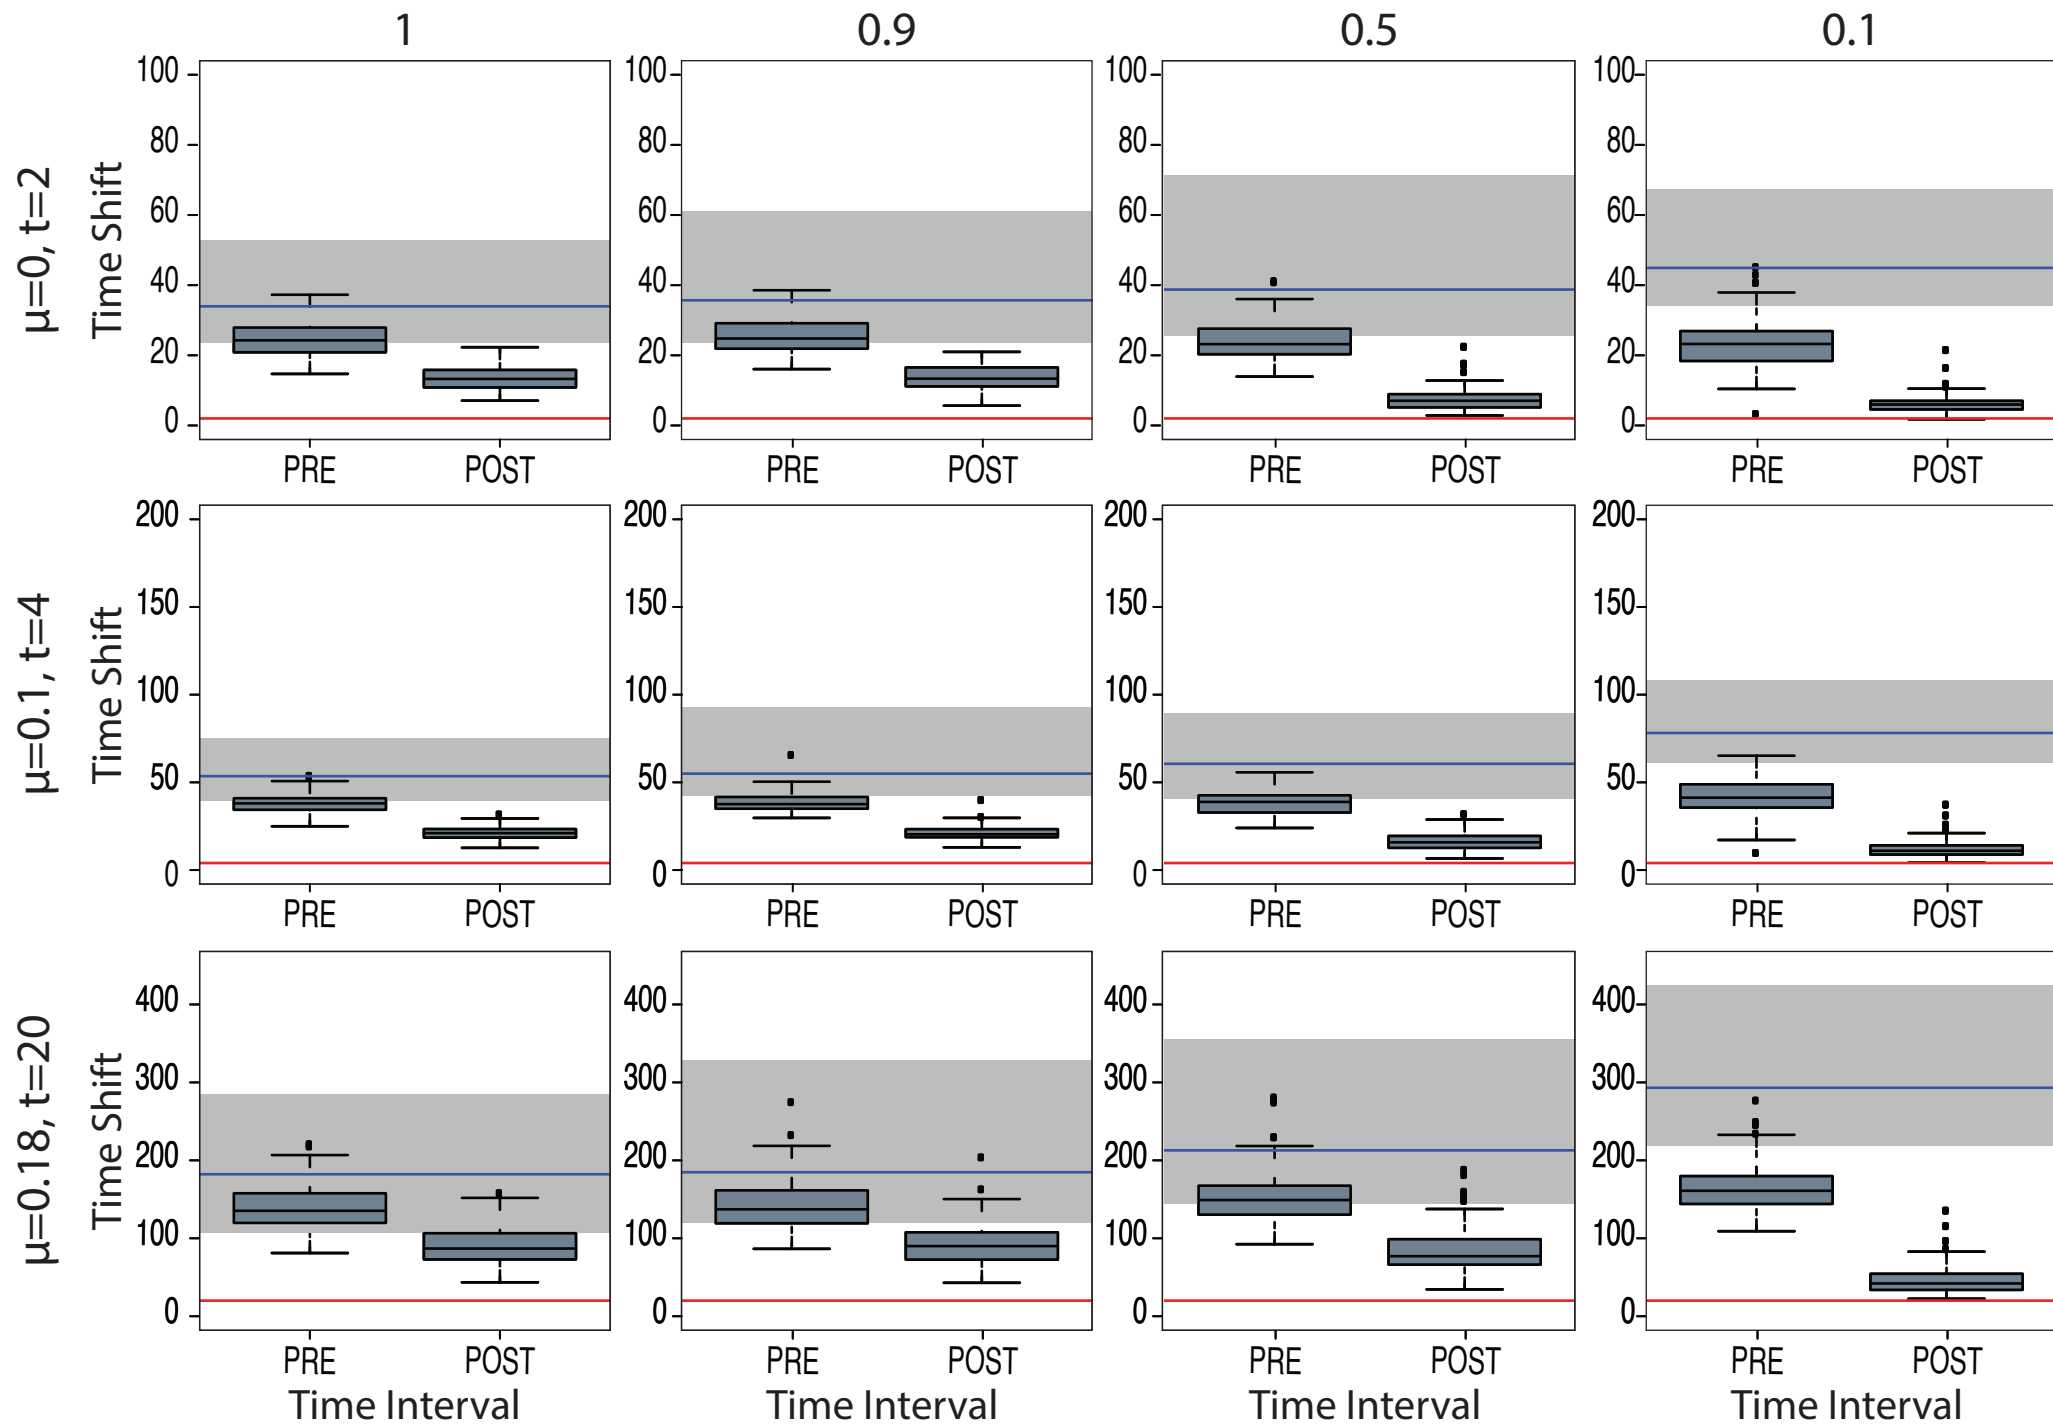

Supplement: EVO-73-1133-s018.pdf [file EVO-73-1133-s018.pdf]
